# Supplementary material
Source: publisher figshare collection journal article supplement (https://acs.figshare.com/ndownloader/files/3602010)
Supplement: Supplementary file 1 [file 3602010]

# Supplementary Information

## wALADin benzimidazoles differentially modulate the function of porphobilinogen synthase orthologs

Christian S. Lentz<sup>†</sup>, Victoria S. Halls<sup>‡</sup>, Jeffrey Hannam<sup>‡</sup>, Silke Strassel<sup>†</sup>, Sarah H. Lawrence<sup>□</sup>, Eileen K. Jaffe<sup>□</sup>, Michael Famulok<sup>‡</sup>, Achim Hoerauf<sup>†</sup>, Kenneth M. Pfarr<sup>†\*</sup>

<sup>†</sup> Institute of Medical Microbiology, Immunology and Parasitology, University Hospital of Bonn, Sigmund-Freud Str. 25, 53127 Bonn, Germany

<sup>‡</sup> LIMES Institute, Chemical Biology & Medicinal Chemistry Unit, University of Bonn, Gerhard-Domagk-Str. 1, 53121 Bonn, Germany

<sup>□</sup> Fox Chase Cancer Center, Temple University Health System, 333 Cottman Ave, Philadelphia, PA, 19111 USA.

### Contents:

Figure S1: Multiple Sequence Alignment of orthologous PBGS protein sequences – p. 2

Figure S2: Inhibition of *Ps*PBGS and *w*PBGS by wALADin1 – p.4

Figure S3: Phylogeny of PBGS – p. 5

Figure S4: The effect of KCl, pH, and [5-ALA] on wALADin1 activity against *Pa*PBGS – p.7

Figure S5: pH screen of stimulated *Vc*, *Ye* and *Ec*PBGS orthologs - p. 9

Figure S6: The effect of K<sup>+</sup> on the interaction of *Pa*PBGS and wALADin1 – p. 10

Figure S7: Michaelis-Menten kinetics of *Pa*PBGS – p. 7

Figure S8: Structural representation of Mg<sup>2+</sup>- and K<sup>+</sup>-binding sites in the *Pa*PBGS octamer – p. 13

Supplementary Methods (Thermal Shift Assay) – p. 14

Supplementary References – p.14

|            |     |     |            |             |             |            |             |       |            |             |             |             |            | -----Allosteric K----- |  |
|------------|-----|-----|------------|-------------|-------------|------------|-------------|-------|------------|-------------|-------------|-------------|------------|------------------------|--|
| PBGS group | Z   | Hs  | 1          | -----       | -----       | MQPQ       | S           | ----- | VLH        | SGYFH PLLRA | WQTATTT LNA | SNLIYPIFVT  | DVPDDIQPIT | 48                     |  |
|            |     | Dm  | 1          | -----       | -----       | MERK       |             | ----- | LH         | SGMHHTLRQ   | LQESGCEIAP  | HNLMYPVFIV  | SNDDDVQPIA | 46                     |  |
|            |     | Ec  | 1          | -----       | -----       | MTDLIQ     |             | ----- | RPR        | RLRKS PALRA | MFEET-TLSL  | NDLVLPFVFE  | EBIDDKAVE  | 48                     |  |
|            | Y   | Vc  | 1          | -----       | -----       | MSVSIQ     | G-QFPGRRLR  |       |            | RLRKHDFSRR  | LVAEN-QLSV  | NDLIYPMFIL  | MGKDRREKVD | 54                     |  |
|            |     | Ye  | 1          | -----       | -----       | MSYAFP     | G-TFPGRRMR  |       |            | RVRRHDFSRR  | LVAEN-QLTV  | NDLIYPVFVM  | EGNNHQAVS  | 54                     |  |
|            |     | Tg  | 303        | MTPRGPLDNN  | NYGEVWLPIQ  | A          | -----       | RPR   |            | RNRKNRAVRQ  | LVQEN-LVKP  | SSLIYPLFVH  | DEETSVP-IP | 364                    |  |
| X+Y        | Pa  | 1   | -----      | -----       | MSFTPA      | NRAPYTRLR  |             |       | RNRDDDFSRR | LVREN-VLTV  | DDLILPVFVL  | DGVNQRESIP  | 55         |                        |  |
| X          | W   | 1   | -----      | -----       | MMFNFP      | N          | -----       | TRLR  | RRRSSKWVRN | LTSES-ALSV  | NDLIPLFVH   | DREETTELVS  | 50         |                        |  |
|            | Ps  | 69  | -----      | -----       | SLPIQ       | R          | -----       | RPR   | RNRSPALRS  | AFQET-TLSP  | ANFVYPLFIH  | EGEEDTP-IG  | 115        |                        |  |
|            |     |     |            |             |             |            |             |       |            |             |             |             |            |                        |  |
| PBGS group | Z   | Hs  | 49         | SLPGVARYGV  | KR-LEEMLRP  | LVEEGLRCVL | IFGVP SRVPK |       |            | DERGSAADSE  | ESPAIEAIHL  | LKRTFPNLLV  |            | 117                    |  |
|            |     | Dm  | 47         | SMPGISRFGL  | NR-LKEHLEP  | LVAKGLSSVL | LFGVVDPMK   |       |            | DEQASNADSA  | KNPVVLALPK  | LREWFPDLII  |            | 115                    |  |
|            |     | Ec  | 49         | AMPGVMRIPE  | KH-LAREIER  | IANAGIRSV  | TFGISHTDE   |       |            | T--GSDAWRE  | DGLVARMSRI  | CKQTVPEMIV  |            | 115                    |  |
|            | Y   | Vc  | 55         | SMPGVERLSI  | DL-MLEEAQY  | LANLGVPAIA | LFPVNVQDAK  |       |            | SLCAAEAYNP  | EGLVQRAVRA  | LKEHVPQMGV  |            | 123                    |  |
|            |     | Ye  | 55         | SMPGVSRMTI  | DL-LVKEAEA  | IAKLGVPVIS | LFPVIEFGMK  |       |            | SLHAEEAAYNP | NGLVQRTVRA  | LKDAVPELGI  |            | 123                    |  |
|            |     | Tg  | 365        | SMPGQSRLSM  | ED-LLKEVGE  | ARSYGIKAFM | LFPKVDEELK  |       |            | SVMAEESYNP  | DGLLPRAIMA  | LKEAFPDVLL  |            | 433                    |  |
|            | X+Y | Pa  | 56         | SMPGVERLSI  | DQ-LLIEAEE  | WVALGIPALA | LFPVTPEVK   |       |            | SLDAEAAYNP  | EGT AQRATRA | LHREFPPELGI |            | 124                    |  |
|            | X   | W   | 51         | SLPGMKCYSI  | DG-LVSIAQE  | AEDLGINAVA | IFPVVDSKLK  |       |            | SENAAEAAYNS | DNLICKAIRA  | IKLKVPGIGI  |            | 119                    |  |
|            |     | Ps  | 116        | AMPGCYRLGW  | RHGLLEEVAK  | ARDVGNSVV  | LFPKIPDALK  |       |            | TPTGDEAYNE  | DGLVPRSIRL  | LKDKYPDIII  |            | 185                    |  |
|            |     |     |            |             |             |            |             |       |            |             |             |             |            |                        |  |
| PBGS group | Z   | Hs  | 118        | ACDVLCIPYT  | SHGHCGLLSE  | -NGAFRAEES | RORLAEVAIA  |       |            | YAKAGCOVVA  | PSDMDGRVE   | AIKEALMAHG  |            | 186                    |  |
|            |     | Dm  | 116        | ACDVLCIPYS  | SHGHCGLLGE  | -TG-LENGPS | IKRIAETAVA  |       |            | YAKAGAHIVA  | PSDMDNRVK   | AIKQALIDAQ  |            | 183                    |  |
|            |     | Ec  | 116        | MSDTLCFEYT  | SHGHCGLVCE  | --HGVDNDAT | LENLGKQAVV  |       |            | AAAAGADFIA  | PSAAMDGVQV  | AIRQALDAAG  |            | 183                    |  |
|            | Y   | Vc  | 124        | ITDVLTPPFT  | THGQCGIIDE  | -QGYVLNDET | TEVLVKQALS  |       |            | HAQAGADVVA  | PSDMDGRIG   | RIRQALEEAG  |            | 192                    |  |
|            |     | Ye  | 124        | LTDVLTPPYT  | THGQCGVIDA  | -DGYVINDIT | KEILVRQALS  |       |            | HADAGAEIVA  | PSDMDGRIG   | AIRDQLELQG  |            | 192                    |  |
|            |     | Tg  | 434        | LADVLPYPS   | SMGCGGVVDE  | QSGKIVNDLT | VHQLCKQAIT  |       |            | LARAGADMVC  | PSDMDGRVS   | AIRESLDMEG  |            | 503                    |  |
|            | X+Y | Pa  | 125        | ITDVLTPPFT  | THGQCGILDD  | -DGYVLNDVS | IDVLVRQALS  |       |            | HAEAGQVVA   | PSDMDGRIG   | AIREALESAG  |            | 193                    |  |
|            | X   | W   | 120        | IADVLPYPYT  | THGCGILGKS  | NQIDVENDKT | VSLCKQALA   |       |            | LAKAGCNIVA  | SSDMDGRVG   | RIRKVLDDNN  |            | 189                    |  |
|            |     | Ps  | 186        | YTDVLTPYPS  | SDGCGGVIRE  | D-GVIMNDET | VHQLCKQAVA  |       |            | QARAGADVVS  | PSDMDGRVG   | AMRVALDAEG  |            | 254                    |  |
|            |     |     |            |             |             |            |             |       |            |             |             |             |            |                        |  |
| PBGS group | Z   | Hs  | 187        | LGNRVSVMSY  | SAIFASCFYG  | PFDAAKSSP  | --AFGDRRCY  |       |            | QLPFGARGLA  | LRAVDKDVRE  | GADMLMKPG   |            | 254                    |  |
|            |     | Dm  | 184        | M-NSVSLLAY  | SAIFTSNIFYG | PFEAAQSAP  | --KFGDRRCY  |       |            | QLPSGSRSLA  | MRAIQKDVAE  | GADMLMKPG   |            | 250                    |  |
|            |     | Ec  | 184        | FKD-TAIMSY  | SAIFASSFYG  | PFEAAAGSAL | ---KGDRCYS  |       |            | QMNPMNRREA  | IRESLDEAQ   | GADCLMKPA   |            | 249                    |  |
|            | Y   | Vc  | 193        | YIH-TQIMAY  | SAIYASNYYG  | PFDAAVGSAS | NLKGKKNKTY  |       |            | QMDPANSDEA  | LHEVAMDI NE | GADMMVMKPG  |            | 261                    |  |
|            |     | Ye  | 193        | LVN-TQIMAY  | SAIYASCYYG  | PFDAAIGSSS | NLKGKKNKTY  |       |            | QMDPANSDEA  | LOEIAQDLQE  | GADMMVMKPG  |            | 261                    |  |
|            |     | Tg  | 504        | CTD-TSILAY  | SAIYASSFYG  | PFDALDLSHM | -VGGTDRKTY  |       |            | QMDPSNSREA  | EREAEADASE  | GADMLMKPG   |            | 571                    |  |
|            | X+Y | Pa  | 194        | HTN-VRIMAY  | SAIYASAYYG  | PFDAAVGSAS | NLKGKKNKTY  |       |            | QMDPANSDEA  | LHEVAA DLAE | GADMMVMKPG  |            | 262                    |  |
|            | X   | W   | 190        | LQD-VSILSY  | AVIYCSSFYA  | PFDQIVGSCV | SSNSIDKSGY  |       |            | QMDYRNAREA  | ICEIEMDLNE  | GADFIMVKPG  |            | 258                    |  |
|            |     | Ps  | 255        | FQH-VSIMSY  | TAIYASSFYG  | PFEAALDSNP | -RFG-DRKTY  |       |            | QMNPNANYREA | LTEMREDESE  | GADILLVKPG  |            | 276                    |  |
|            |     |     |            |             |             |            |             |       |            |             |             |             |            |                        |  |
| PBGS group | Z   | Hs  | 255        | MPYLDIVREV  | KDKHPDLPLA  | VYHVSGEFAM | LWHGAQAGAF  |       |            | DLKAAVLEAM  | TAFRRAGADI  | IITYYTPQLL  |            | 324                    |  |
|            |     | Dm  | 251        | MPYLDILIRST | KDSYPYHTLY  | VYQVSGEFAM | LYHAAKAGAF  |       |            | DLKDVALEAM  | KGFRAGADC   | IITYYTPFLL  |            | 320                    |  |
|            |     | Ec  | 250        | GAYLDIVREL  | RERT-ELPIG  | AYQVSGEYAM | IKFAALAGAI  |       |            | DEKVVLES    | GSIKRAGADL  | IFSIFYALDLA |            | 318                    |  |
|            | Y   | Vc  | 262        | MPYLDVVRV   | KTEL-QVPTF  | AYQVSGEYAM | HKAAIMNGWL  |       |            | KERETVFESL  | LCFKRAGADG  | ILTYFAKEVA  |            | 330                    |  |
|            |     | Ye  | 262        | MPYLDVVRV   | KDTF-GVPTF  | AYQVSGEYAM | HMAAIQNGWL  |       |            | QEKPTVMESL  | LCFKRAGADG  | VLTYFAKQVA  |            | 330                    |  |
|            |     | Tg  | 572        | LPYLDVLAKI  | REKS-KLPMV  | AYHVSGEYAM | LKAAA EGYI  |       |            | SEKDTVLEVL  | KSFRRAGADA  | VATYYAKEAA  |            | 640                    |  |
|            | X+Y | Pa  | 263        | MPYLDIVRV   | KDEF-RAPTF  | VYQVSGEYAM | HMGAIQNGWL  |       |            | AES-VILES   | TAFKRAGADG  | ILTYFAKQAA  |            | 330                    |  |
|            | X   | W   | 259        | MPYLDI IKMA | SDEF-NFPIF  | AYQVSGEYAM | IKAAATNNGWL |       |            | DYDKVIYESL  | VGFKRAGASA  | IFTYAAALDVA |            | 327                    |  |
|            |     | Ps  | 277        | LPYLDIIRLL  | RDNS-PLPIA  | AYQVSGEYSM | IKAGGALKMI  |       |            | DEKVMMESL   | LCLRRAGADI  | ILTYFALQAA  |            | 390                    |  |
|            |     |     |            |             |             |            |             |       |            |             |             |             |            |                        |  |
| PBGS group | Z   | Hs  | 324        | QWLKEE      | LEHH        | HHHH       | ---         |       |            |             |             |             |            | 338                    |  |
|            |     | Dm  | 321        | DIIGKVK     | ---         | ---        | ---         |       |            |             |             |             |            | 327                    |  |
|            |     | Ec  | 319        | EKKILR      | ---         | ---        | ---         |       |            |             |             |             |            | 324                    |  |
|            | Y   | Vc  | 331        | EWLAEDSAKA  | AQFLPKK     | ---        | ---         |       |            |             |             |             |            | 347                    |  |
|            |     | Ye  | 331        | QWLHDDQMQR  | ---         | ---        | ---         |       |            |             |             |             |            | 340                    |  |
|            |     | Tg  | 641        | KWMVEDMKGT  | OKFTEPCY    | ---        | ---         |       |            |             |             |             |            | 658                    |  |
|            | X+Y | Pa  | 331        | EQLRRGRGLGH | HHHHH       | ---        | ---         |       |            |             |             |             |            | 345                    |  |
| X          | W   | 328 | KNLRLEHHHH | HH          | ---         | ---        |             |       |            |             |             |             | 339        |                        |  |
|            | Ps  | 391 | RTLCEGKR   | ---         | ---         | ---        |             |       |            |             |             |             | 398        |                        |  |

**Figure S1.** Multiple Sequence Alignment of orthologous protein sequences of *Homo sapiens* (Hs, Uniprot ID P13716), *Drosophila melanogaster* (Dm, Q9VTV9), *Escherichia coli* (Ec; P0ACB2), *Vibrio cholerae* (Vc; C3LPU7), *Pseudomonas aeruginosa* (Pa; Q59643), *Yersinia enterocolitica* (Ye; F4MUJ9), *Toxoplasma gondii* (Tg; B6KNM2), *Wolbachia* of *Brugia malayi* (W; Q5GSR3) and *Pisum sativum* (Ps; P30124) PBGS by ClustalW implemented W in GENTle V 1.9.4 (Magnus Manske, Cologne, 2003) using a BLOSUM matrix and the following scores: Match: 2; Gap external penalty: -1; Gap penalty: -2. The N-terminal sequence chloroplast targeting sequence of *Ps*PBGS (amino acids 1 - 68) and the apicoplast targeting sequence and low complexity region (amino acids 1 – 302) of *Tg*PBGS were excluded from the respective recombinant proteins. C-terminal tags of recombinant proteins are underlined and italicized, if present. Important structural features are highlighted: Binding site for allosteric  $K^+$  (red font, full motif according to *Pa*PBGS), Catalytic  $Zn_B^{2+}$ -site (red), the alternative motif of  $Zn^{2+}$ -independent orthologs (cyan),  $Zn_A^{2+}$ -site (brown), binding site for A-side 5-ALA (i.e. the 5-ALA giving rise to the Acetyl moiety in porphobilinogen, green), binding site for P-side 5-ALA (i.e. the 5-ALA giving rise to the Propionyl moiety in porphobilinogen, blue), active site lid (green font), the allosteric  $Mg_C$  binding site (yellow) or the characteristic arginine residue of non  $Mg^{2+}$ -responsive orthologs (yellow font on black background). Orthologous PBGS protein sequences were aligned in a multiple sequence alignment with Clustal

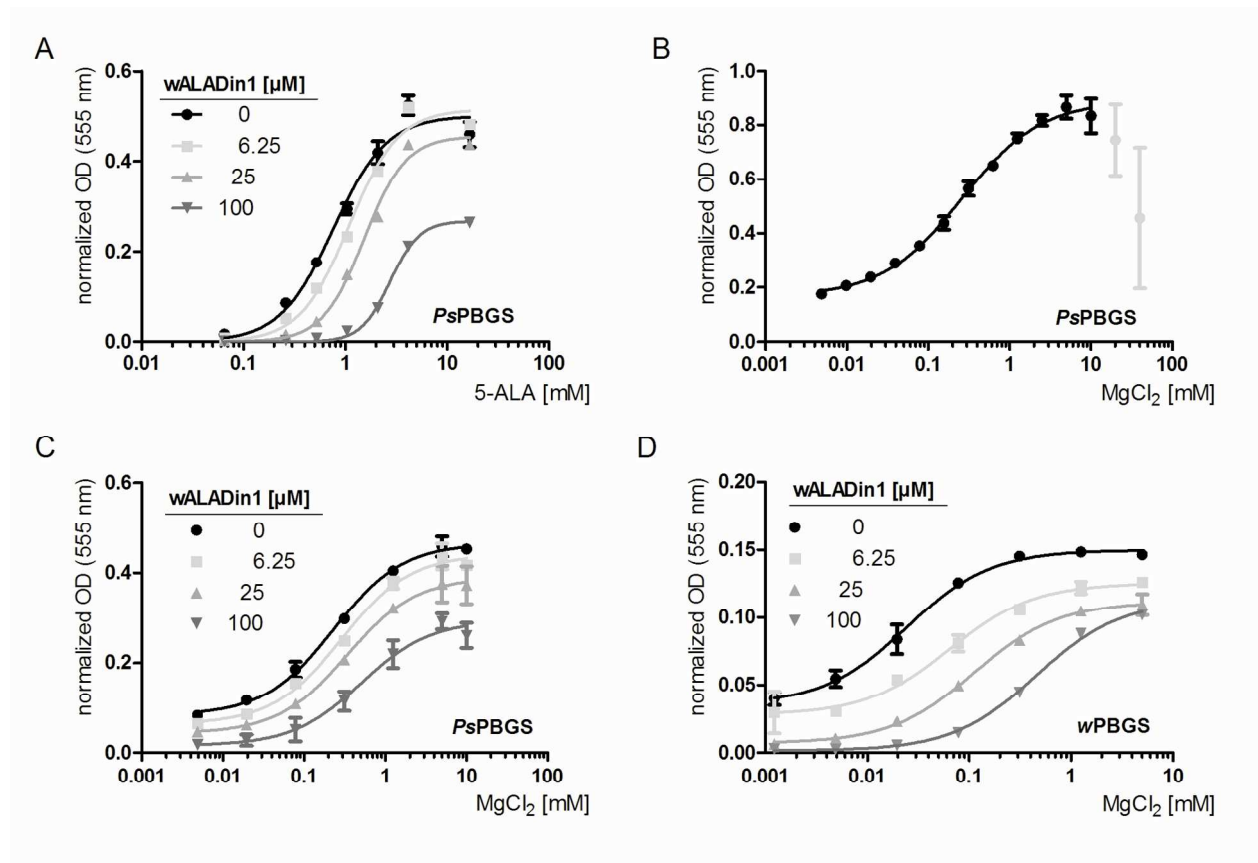

**Figure S2.** Inhibition of *PsPBGS* and *wPBGS* by *wALADin1*. A) Substrate-concentration series of *PsPBGS* in the presence of increasing concentrations of *wALADin1*. Curves were fit assuming an “Allosteric sigmoidal” model using Prism 5.0 software ( $Y = V_{\text{MAX}} * X^h / (K' + X^h)$  with  $K'$  being related but not identical to  $K_M$ , unless  $h = 1$ ). A reduction in  $V_{\text{MAX}}$  and an increase in  $K'$  are consistent with a mixed competitive/noncompetitive model of inhibition. Hill slopes were as follows: 1.665 (0  $\mu\text{M}$  *wALADin1*); 1.795 (6.25  $\mu\text{M}$  *wALADin1*); 2.111 (25  $\mu\text{M}$  *wALADin1*); 3.020 (100  $\mu\text{M}$  *wALADin1*). B)  $\text{Mg}^{2+}$ -response curve of *PsPBGS* with a  $K_{0.5}$  of  $\sim 257 \mu\text{M}$  at a saturating 5-ALA concentration of 10 mM. High inhibitory  $\text{Mg}^{2+}$  concentrations (depicted in grey) were excluded from non-linear regression analysis. C) *wALADin1* reduced the affinity for  $\text{Mg}^{2+}$  and decreased the maximum activity achieved by stimulation of *PsPBGS* by  $\text{Mg}^{2+}$  and D) *wPBGS*. Graphs B - D were fit to a sigmoidal four parameter non-linear regression

model. For *w*PBGS the decrease in affinity to  $Mg^{2+}$  was nearly 10-fold more pronounced than for *Ps*PBGS (18.6-fold vs. 2.2-fold increase of  $K_{0.5}$  at 100  $\mu$ M *w*ALADin1, respectively). *Ps*PBGS was assayed at 300 nM in 100 mM BTP-HCl pH 8.5, 1 mM  $MgCl_2$ , 5 mM DTT for 15 min, *w*PBGS at 500 nM in 100 mM Tris-HCl pH 8.0, 1 mM  $MgCl_2$ , 5 mM DTT, if not indicated otherwise. Graphs show means  $\pm$  SD of triplicates and are representative of 2 independent experiments.

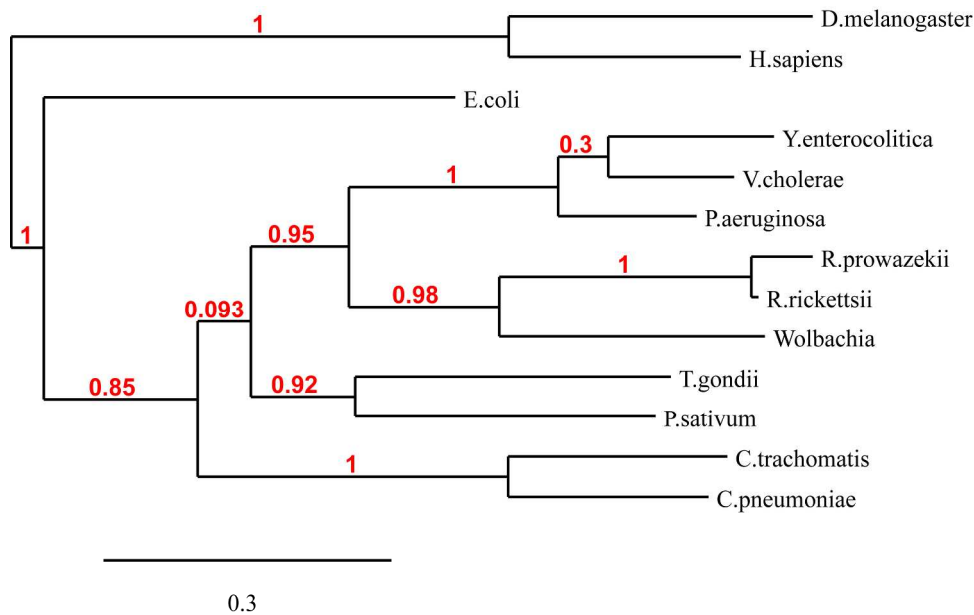

**Figure S3.** Phylogeny of PBGS. The tree was created using alignment, curation, phylogeny and tree rendering programs integrated into the website [www.phylogeny.fr](http://www.phylogeny.fr).<sup>1,2</sup> Input sequences were: *V. cholerae* (UniProtKB C3LPU7), *Y. enterocolitica* (F4MUJ9), *E. coli* (P0ACB2), *D. melanogaster* (Q9VTV9), *P. sativum* (P30124), *T. gondii* (B6KNM2), *H. sapiens* (P13716), *Wolbachia* of *B. malayi* (Q5GSR3). In addition, PBGS sequences from the obligate intracellular bacteria *Rickettsia rickettsii* (B0BY42), *R. prowazekii* (Q9ZD11), *Chlamydia pneumoniae* (Q9Z7G1) and *C. trachomatis* (O84638) were entered. The initial multiple sequence alignment was done using MUSCLE<sup>3</sup> (v. 3.7) using default settings. Gblock<sup>4</sup> (v091.b) was used to remove

ambiguous regions (Settings: Minimum sequences for flank position: 85%; Maximum contiguous nonconserved positions: 8; Minimum block length: 10; Gaps in final blocks: no). The phylogenetic tree was created using a maximum likelihood method implemented in PhyML<sup>5, 6</sup> (v3.0 *aRLT*) (Settings: Model: WAG; Statistical test: alrt; Number of categories: 4; Gamma: estimated; Invariable sites: estimated; Remove gaps: enabled). The graphical representation of the tree was done with TreeDyn<sup>7</sup> (v198.3). The red numbers indicate branch support values, the branch length scale is shown in black.

A

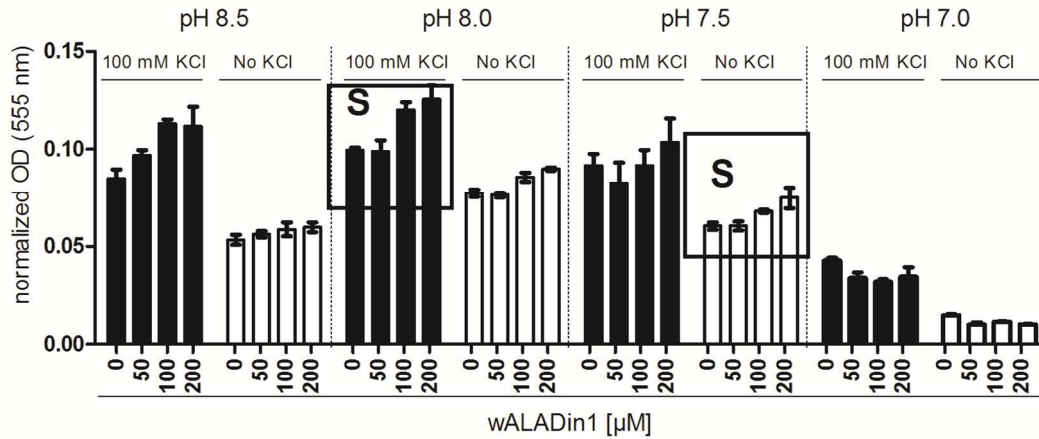

B

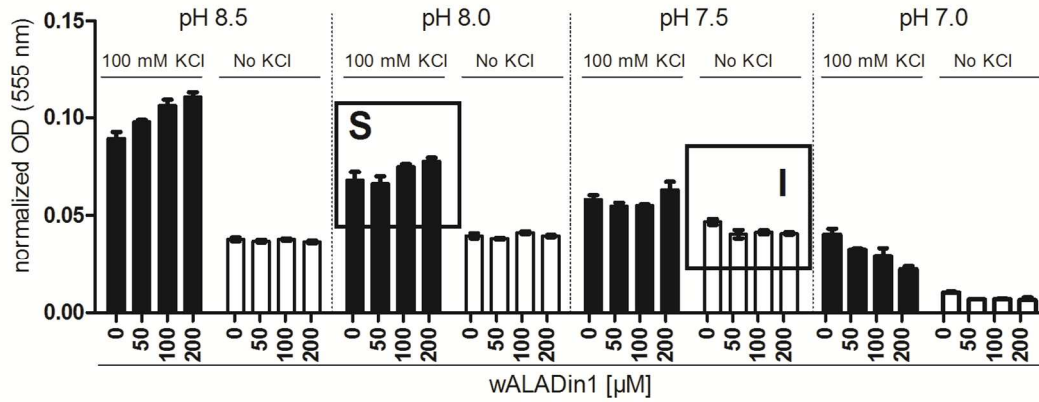

C

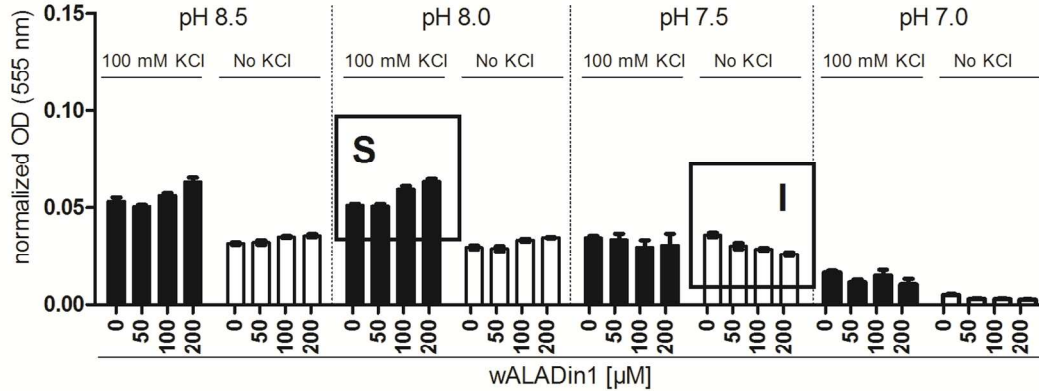

**Figure S4.** The effect of KCl, pH, and [5-ALA] on wALADin1 activity against *Pseudomonas aeruginosa* PBGS. A) Saturating 5-ALA concentration: 5 mM. B) Near-saturating 5-ALA concentration: 1 mM. C) Non-saturating 5-ALA concentration: 200  $\mu$ M. Closed bars: 100 mM KCl; open bars: no KCl. Boxes with “S” mark conditions under which the stimulatory effect of

wALADin1 on *Pa*PBGS was most pronounced, boxes with “T” mark conditions with strong inhibitory effects.



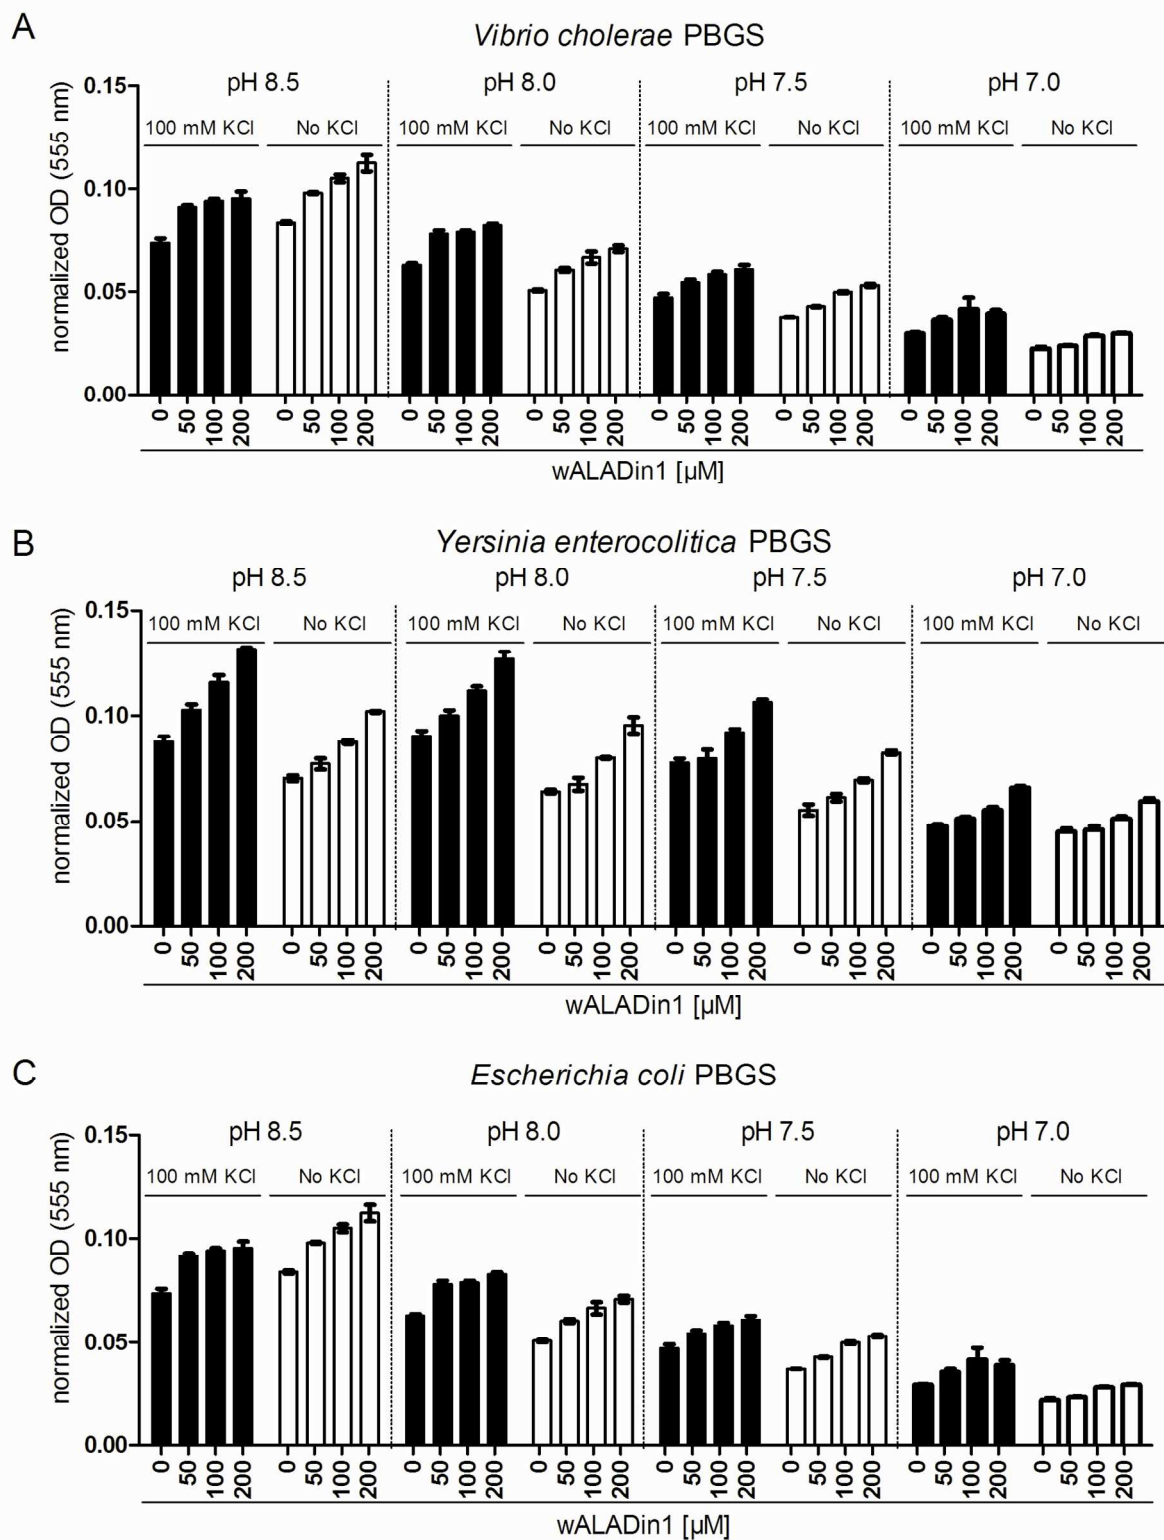

**Figure S5.** pH screen of stimulated *Vc*, *Ye* and *Ec*PBGS orthologs: A) *Vibrio cholerae* PBGS (125 nM); B) *Yersinia enterocolitica* PBGS (150 nM); C) *Escherichia coli* PBGS (200 nM). wALADin1 acted in a stimulatory fashion under all conditions tested. For all orthologs enzymatic assays were carried out in 100 mM BTP-HCl, 1 mM MgCl<sub>2</sub>, 5 mM DTT and 200 μM 5-ALA for 10 min. *Ec*PBGS contained 10 μM ZnCl<sub>2</sub>. Graphs show means ± SD of triplicates.

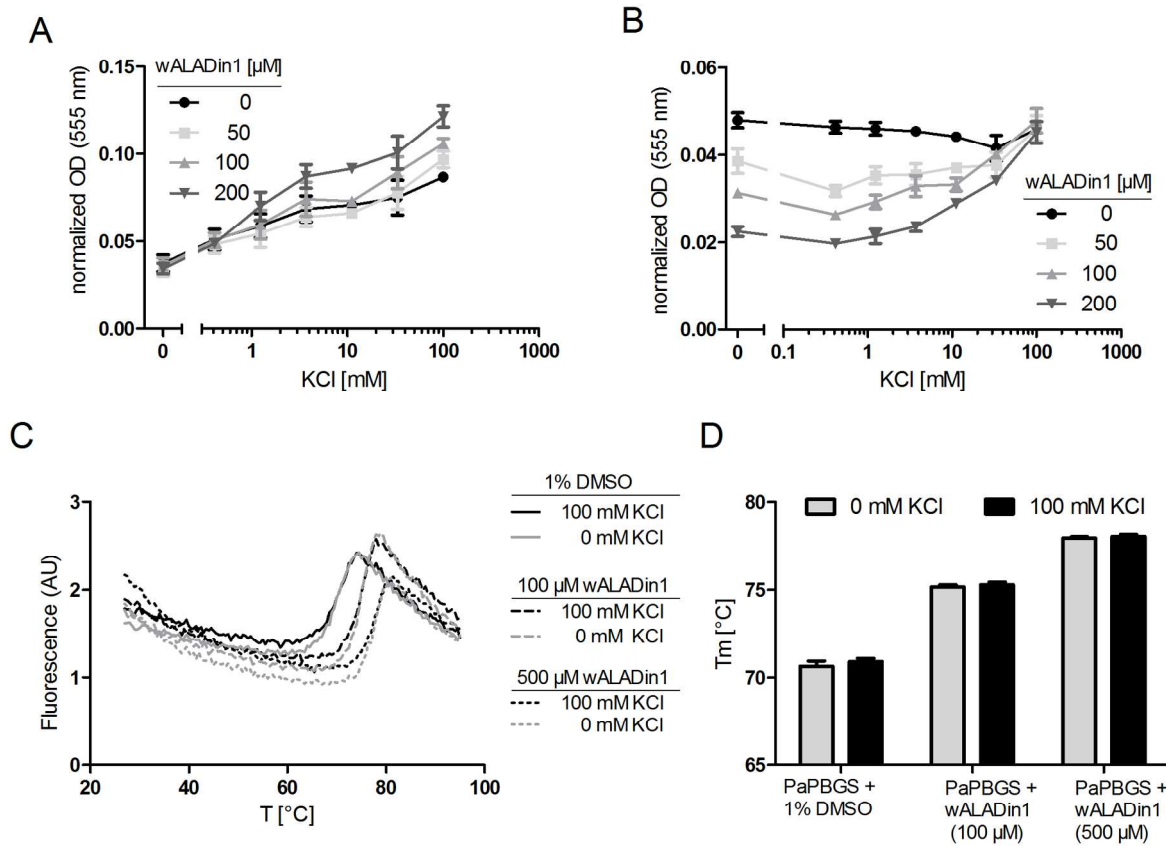

**Figure S6.** The effect of K<sup>+</sup> on the interaction of *Pa*PBGS and wALADin1. (A), (B) Effect of K<sup>+</sup> dilution series on *Pa*PBGS activity under the influence of wALADin1. A) While in the absence of K<sup>+</sup> no stimulatory activity of wALADin1 is observed, at high [KCl] wALADin1 stimulated *Pa*PBGS activity (standard stimulatory conditions: 100 mM Tris-HCl pH 8.0, 5 mM 5-ALA, 1 mM MgCl<sub>2</sub>). B) In contrast, under “standard inhibitory” conditions (100 mM Tris-HCl pH 7.5, 0.2 mM 5-ALA, 1 mM MgCl<sub>2</sub>) high [KCl] counteracted the inhibitory effect of wALADin1. (A)

and (B) show means  $\pm$  SD of triplicates and are representative of two experiments. (C), (D) Protein thermal shift assay of *Pa*PBGS. A) Melting curve of *Pa*PBGS monitored as an increase in Sypro<sup>®</sup> Orange fluorescence bound to denatured protein. (B) Melting temperature ( $T_m$ ) of *Pa*PBGS under the different conditions. KCl had no influence on the melting temperature in the presence or absence of wALADin1. 5  $\mu$ M *Pa*PBGS was incubated in 100 mM Tris-HCl pH 8.0, 10 mM MgCl<sub>2</sub>, and 8X Sypro<sup>®</sup> Orange in the presence or absence of 100 mM KCl with 1% DMSO, and 100  $\mu$ M or 500  $\mu$ M wALADin1. The graphs are representative of two experiments.

A

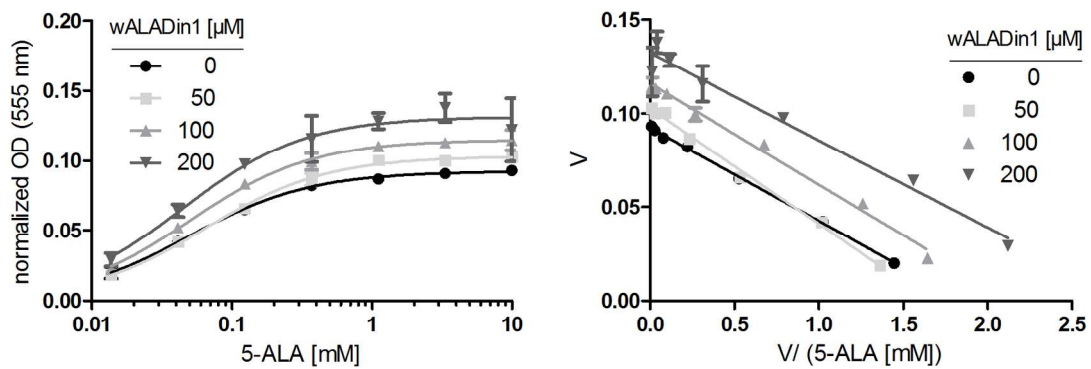

B

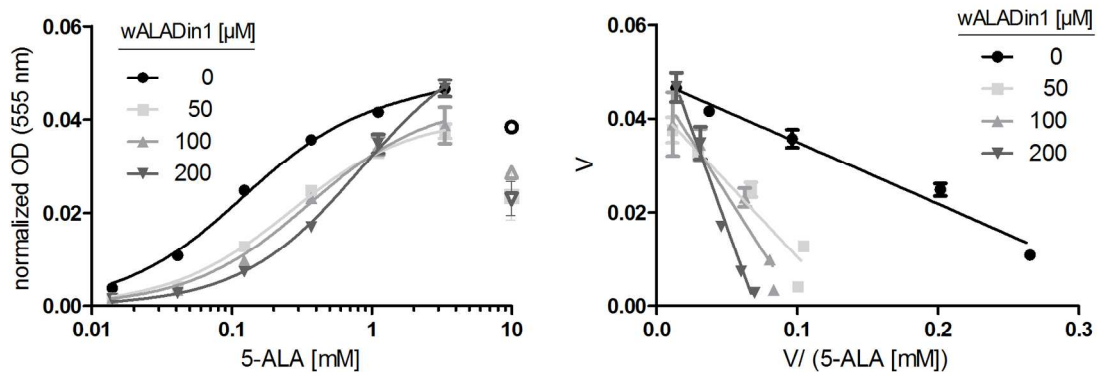

**Figure S7.** Michaelis-Menten kinetics of *Pa*PBGS. A) Stimulatory (100 mM Tris-HCl pH 8.0, 5 mM 5-ALA, 1 mM MgCl<sub>2</sub>, 100 mM KCl, if not indicated otherwise). B) Inhibitory conditions (100 mM Tris-HCl pH 7.5, 0.2 mM 5-ALA, 1 mM MgCl<sub>2</sub>, no KCl). Graphs include 5-ALA dilution series showing curves fit by non-linear regression assuming conventional Michaelis-Menten kinetics (left) and linearized Eadie-Hofstee representation of this data (right). A) Under “standard stimulatory” conditions  $V_{MAX}$  increased with increasing concentrations of wALADin1, while  $K_M$  was not affected. B) Under “standard inhibitory” conditions a non-canonical progression of the 5-ALA response curve and the linearized Eadie-Hofstee representation was observed.  $K_M$  was increased in a concentration-dependent manner while  $V_{MAX}$  was decreased at 50 and 100  $\mu$ M wALADin1, but increased at higher concentrations of wALADin1. [5-ALA] > 10 mM resulted in apparent enzyme inhibition by the substrate, thus the corresponding data points were excluded from the regression analysis. All graphs show means  $\pm$  SD of triplicates and are representative of two experiments.

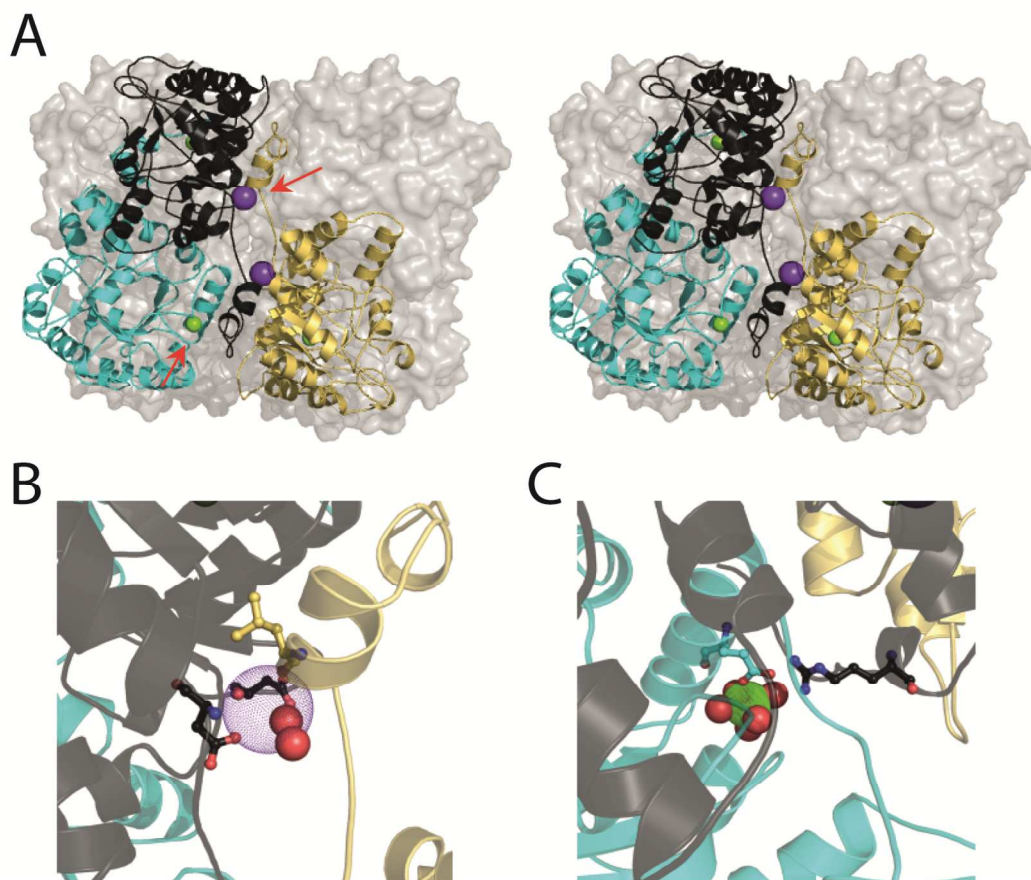

**Figure S8.** Structural representation of  $\text{Mg}^{2+}$ - and  $\text{K}^{+}$ -binding sites in the *Pa*PBGS octamer. **(A)** A stereoview of the *P. aeruginosa* PBGS octamer (PDBid 1GZG) is shown with subunits A, C and D as yellow, cyan and black cartoons and the remaining subunits as grey surfaces. The allosteric magnesium ions of subunits A, C and D are shown as green spheres; the allosteric potassium ions of subunit D are shown as purple spheres. Red arrows indicate the specific potassium and magnesium ions detailed in panels B and C, each of which rotate the molecule slightly to improve visualization. **(B)** The featured potassium ion (purple dots) of subunit D interacts with Asp37 and Asp319 of subunit D, Leu27 of subunit A (residues shown as ball-and-sticks with the carbons colored as in panel A and other atoms in CPK), and two water molecules (shown as red spheres). **(C)** The magnesium ion of subunit C (green dots) interacts with Glu245 of subunit C, five water molecules, with a second coordination sphere interaction to Arg19 of subunit A (shown as described for panels A and B).

## Supplementary Methods

**Thermal Shift Assay** The environmentally-sensitive fluorescent dye Sypro<sup>®</sup> Orange (Sigma Aldrich, Munich, Germany) was used to monitor the melting curve of the *Pa*PBGS protein as in previous studies.<sup>8-10</sup> The 10  $\mu$ L reaction mixture contained 5  $\mu$ M *Pa*PBGS subunit in 100 mM Tris-HCl pH 8.0, 1 mM MgCl<sub>2</sub> with or without 100 mM KCl and different concentrations of wALADin1 or DMSO. The protein was denatured in 0.5 °C increments every 30 s from 27 °C to 95 °C and fluorescence (excitation at 470 nm; detection at 510nm) was measured with a RotorGene RG-3000 (Corbett Life Sciences, Qiagen, Hilden, Germany). Melting temperatures ( $T_m$ ) were determined by first derivative analysis of primary fluorescence data using RotorGene 6 software.

## Supplementary References

1. Dereeper, A.; Audic, S.; Claverie J.M., Blanc G. BLAST-EXPLORER helps you building datasets for phylogenetic analysis. BMC Evol. Biol. **2010**, *10*, 8.
2. Dereeper, A.; Guignon, V.; Blanc, G.; Audic, S.; Buffet, S.; Chevenet, F.; Dufayard, J.F.; Guindon, S., Lefort, V.; Lescot, M.; Claverie, J.M.; Gascuel O. Phylogeny.fr: robust phylogenetic analysis for the non-specialist. Nucleic Acids Res. **2008**, *36* (Web Server issue),W465-469.
3. Edgar, R.C. MUSCLE: multiple sequence alignment with high accuracy and high throughput. Nucleic Acids Res. **2004**, *32*, 1792-1797.

4. Castresana, J. Selection of conserved blocks from multiple alignments for their use in phylogenetic analysis. *Mol. Biol. Evol.* **2000**, *17*, 540-552.
5. Guindon, S.; Gascuel, O. A simple, fast, and accurate algorithm to estimate large phylogenies by maximum likelihood. *Syst. Biol.* **2003**, *52*, 696-704.
6. Anisimova, M.; Gascuel, O. Approximate likelihood ratio test for branches: A fast, accurate and powerful alternative. *Syst. Biol.* **2006**, *55*, 539-52.
7. Chevenet, F.; Brun, C.; Banuls, AL.; Jacq, B.; Chisten, R. TreeDyn: towards dynamic graphics and annotations for analyses of trees. *BMC Bioinformatics.* **2006**, *7*, 439.
8. Lentz, C. S.; Halls, V.; Hannam, J. S.; Niebel, B.; Strubing, U.; Mayer, G.; Hoerauf, A.; Famulok, M.; Pfarr, K. M. A selective inhibitor of heme biosynthesis in endosymbiotic bacteria elicits antifilarial activity in vitro. *Chem. Biol.* **2013**, *20*, 177-187.
9. Pantoliano, M. W.; Petrella, E. C.; Kwasnoski, J. D.; Lobanov, V. S.; Myslik, J.; Graf, E.; Carver, T.; Asel, E.; Springer, B. A.; Lane, P.; Salemme, F. R. High-density miniaturized thermal shift assays as a general strategy for drug discovery. *J. Biomol. Screen.* **2001**, *6*, 429-440.
10. Senisterra, G.; Chau, I.; Vedadi, M. Thermal denaturation assays in chemical biology. *Assay. Drug. Dev. Technol.* **2012**, *10*, 128-136.
